# Supplementary material for: Seed-mediated evolution of hierarchical metal–organic framework quaternary superstructures
Source: Royal Society of Chemistry journal article supplement (doi:10.1039/c9sc06064b), 2020-01-01
Supplement: c9sc06064b1.pdf [file c9sc06064b1.pdf]

## Supporting Methods

Metal phthalocyanine  $\text{Co}[\text{Pc}(\text{COOH})_4]$  was synthesized on the basis of previous reports.<sup>1</sup> All other reagents and solvents were purchased from commercial sources and used as received.

**Synthesis of MOF-74-III spherulite.**  $\text{Zn}(\text{NO}_3)_2 \cdot 6\text{H}_2\text{O}$  (40 mg), Linker III (15 mg), EtOH (0.1 mL),  $\text{H}_2\text{O}$  (0.1 mL) and DMF (2 mL) were charged into a Pyrex vial. The mixture was heated in 100 °C oven for 24 h. After cooling down to room temperature, the colorless MOF-74-III spherulites were harvested. To better visualize the morphologies of the superstructure, a small amount of dye ligand, metal phthalocyanine  $\text{Co}[\text{Pc}(\text{COOH})_4]$ , was doped during the one-pot synthesis.  $\text{Zn}(\text{NO}_3)_2 \cdot 6\text{H}_2\text{O}$  (40 mg), Linker III (15 mg), CoPc (1 mg), EtOH (0.1 mL),  $\text{H}_2\text{O}$  (0.1 mL) and DMF (2 mL) were charged into a Pyrex vial. The mixture was heated in 100 °C oven for 24 h. After cooling down to room temperature, deep-blue  $\text{CoPc}@$ MOF-74-III(Zn) spherulites were harvested. The small amount of deep-blue dye molecules could decorate the superstructures without interrupting the growth of spherulites. These spherulites are then be utilized as seeds for the secondary growth of various MOF-74 isorecticular structures.

**Synthesis of MOF-74-II spherulite.**  $\text{Zn}(\text{NO}_3)_2 \cdot 6\text{H}_2\text{O}$  (40 mg), Linker II (15 mg), EtOH (0.1 mL),  $\text{H}_2\text{O}$  (0.1 mL) and DMF (2 mL) were charged into a Pyrex vial. The mixture was heated in 100 °C oven for 24 h. After cooling down to room temperature, the colorless MOF-74-II spherulites were harvested.

**Synthesis of MOF-74-I.**  $\text{Zn}(\text{NO}_3)_2 \cdot 6\text{H}_2\text{O}$  (40 mg), Linker I (12 mg), EtOH (0.1 mL),  $\text{H}_2\text{O}$  (0.1 mL) and DMF (2 mL) were charged into a Pyrex vial. The mixture was heated in 100 °C oven for 24 h. After cooling down to room temperature, the yellow MOF-74-I were harvested.

**Epitaxial growth of MOF-74-III outside MOF-74-III spherulite seeds.** MOF-74-III spherulites (5 mg),  $\text{Zn}(\text{NO}_3)_2 \cdot 6\text{H}_2\text{O}$  (40 mg), Linker III (15 mg), EtOH (0.1 mL),  $\text{H}_2\text{O}$  (0.1 mL) and DMF (2 mL) were charged into a Pyrex vial. The mixture was heated in 100 °C oven for 24 h. After cooling down to room temperature, the core-shell MOF-

74-III@MOF-74-III was obtained.

**Evolution of hierarchical MOF-74-III/plumose MOF-74-II quaternary superstructures.** MOF-74-III spherulites (5 mg),  $\text{Zn}(\text{NO}_3)_2 \cdot 6\text{H}_2\text{O}$  (40 mg), Linker II (15 mg), EtOH (0.1 mL),  $\text{H}_2\text{O}$  (0.1 mL) and DMF (2 mL) were charged into a Pyrex vial. The mixture was heated in 100 °C oven for 24 h. After cooling down to room temperature, the hierarchical MOF-74-III/plumose MOF-74-II quaternary superstructures were obtained.

**Templated evolution of MOF-74-I hollow aggregates.** MOF-74-III spherulites (5 mg),  $\text{Zn}(\text{NO}_3)_2 \cdot 6\text{H}_2\text{O}$  (40 mg), Linker I (15 mg), EtOH (0.1 mL),  $\text{H}_2\text{O}$  (0.1 mL) and DMF (2 mL) were charged into a Pyrex vial. The mixture was heated in 100 °C oven for 24 h. After cooling down to room temperature, the spherical MOF-74-I particles were obtained.

**Powder X-ray diffraction (PXRD).** PXRD was carried out with a Bruker D8-Focus Bragg-Brentano X-ray Powder Diffractometer equipped with a Cu sealed tube ( $\lambda = 1.54178 \text{ \AA}$ ) at 40 kV and 40 mA.

**$^1\text{H}$  NMR spectroscopy.** Nuclear magnetic resonance (NMR) data were collected on an Inova 500 spectrometer.

**Scanning electron microscopy (SEM).** Images and analyses of SEM/EDX were taken by FEI Quanta 600 FE-SEM. The Quanta 600 FEG is a field emission scanning electron microscope capable of generating and collecting high-resolution and low-vacuum images. It is equipped with a motorized x-y-z-tilt-rotate stage, providing the following movements: x = y = 150 mm (motorized); z = 65 mm (motorized); Tilt +70 degrees to -5 degrees (motorized); Source: Field emission gun assembly with Schottky emitter source. Voltage: 200 V to 30 kV. Beam Current: >100 nA.

## Supporting Figures

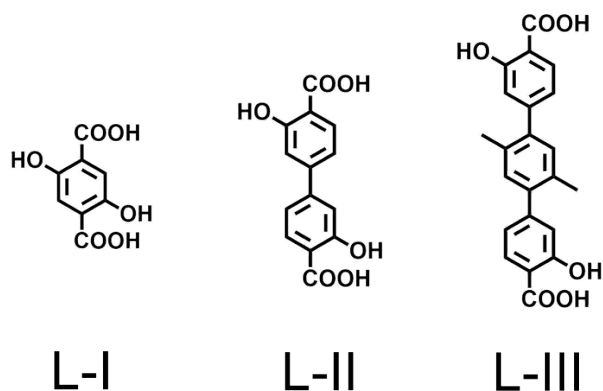

**Figure S1. Organic linkers (I-III) used in this study.**

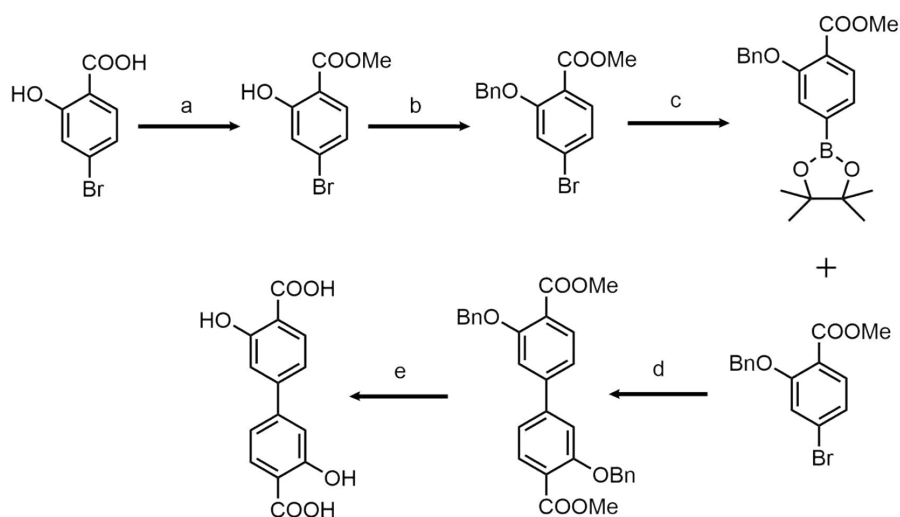

**Figure S2. Synthesis of Linker II.** a) SOCl<sub>2</sub>, MeOH, 75 °C. b) Na<sub>2</sub>CO<sub>3</sub>, BnBr, MeCN, 75 °C. c) (Bpin)<sub>2</sub>, KOAc, Pd(dppf)Cl<sub>2</sub>, 85 °C. d) CsF, Pd(dppf)Cl<sub>2</sub>, *p*-dioxane/H<sub>2</sub>O, 85 °C. e) Pd/C, H<sub>2</sub>, THF/MeOH, 50 °C; NaOH, H<sub>2</sub>O/THF/MeOH, 85 °C. The synthesis of Linker II was conducted based on previously reported methods.<sup>2</sup>

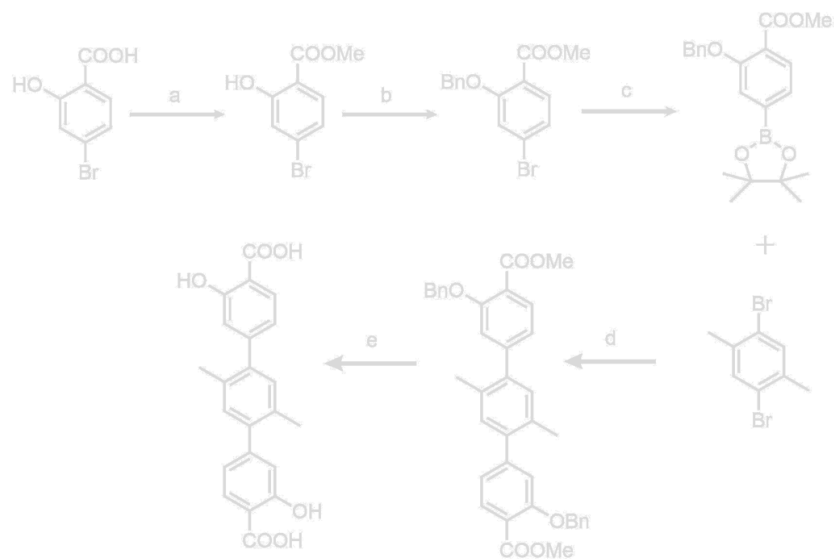

**Figure S3. Synthesis of Linker III.** a)  $\text{SOCl}_2$ , MeOH, 75 °C. b)  $\text{Na}_2\text{CO}_3$ , BnBr, MeCN, 75 °C. c)  $(\text{Bpin})_2$ , KOAc,  $\text{Pd}(\text{dppf})\text{Cl}_2$ , 85 °C. d) CsF,  $\text{Pd}(\text{dppf})\text{Cl}_2$ , *p*-dioxane/ $\text{H}_2\text{O}$ , 85 °C. e) Pd/C,  $\text{H}_2$ , THF/MeOH, 50 °C; NaOH,  $\text{H}_2\text{O}$ /THF/MeOH, 85 °C. The synthesis of Linker III was conducted based on previously reported methods.<sup>2</sup>

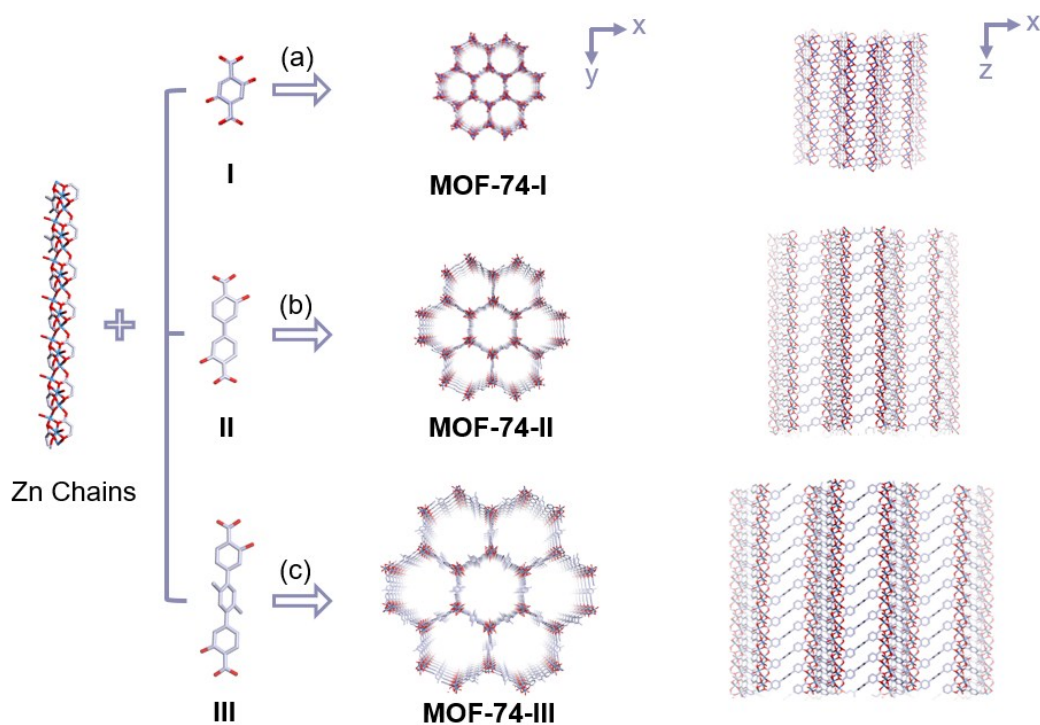

**Figure S4.** Structure of isoreticular MOF-74-II(Zn) with tunable hexagonal channel sizes: (a) MOF-74-I; (b) MOF-74-II; (c) MOF-74-III.

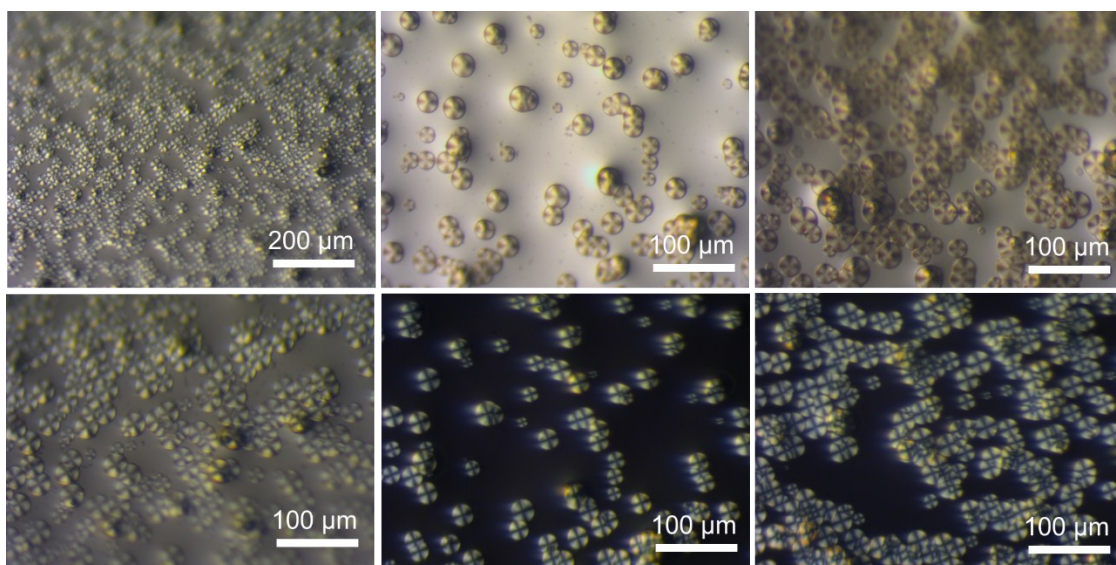

**Figure S5.** Optical images and corresponding polarized optical images of MOF-74-III spherulite seeds at different scales.

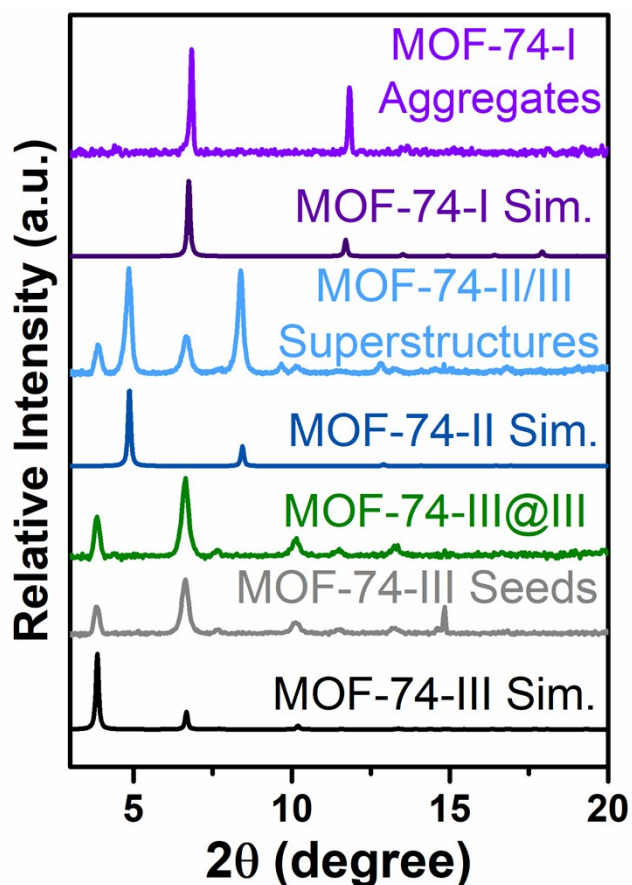

**Figure S6.** Powder X-ray diffraction (PXRD) patterns of MOF-74-III spherulites, MOF-74-III@MOF-74-III spherulites, spherical MOF-74-III/plumose MOF-74-II quaternary superstructures and MOF-74-I hollow aggregates.

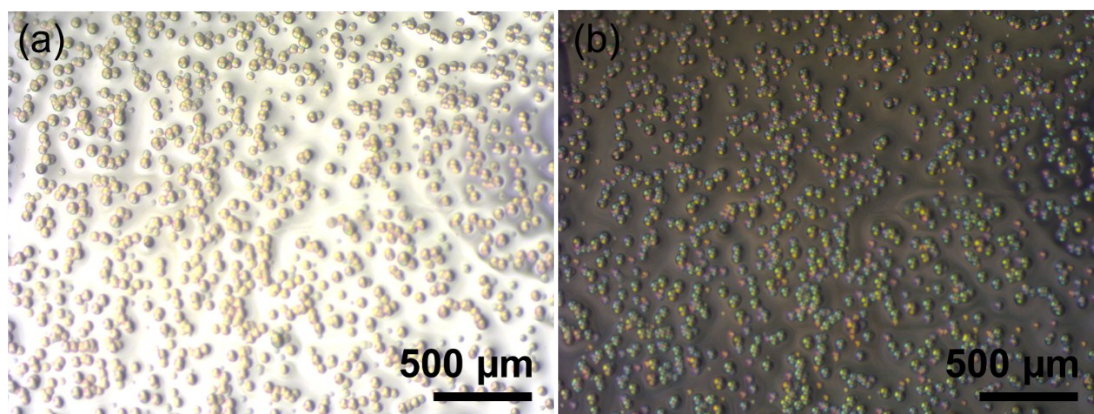

**Figure S7.** (a) Optical images of MOF-74-II spherulites; (b) Polarized optical image of MOF-74-II spherulites placed in between crossed polarizers.

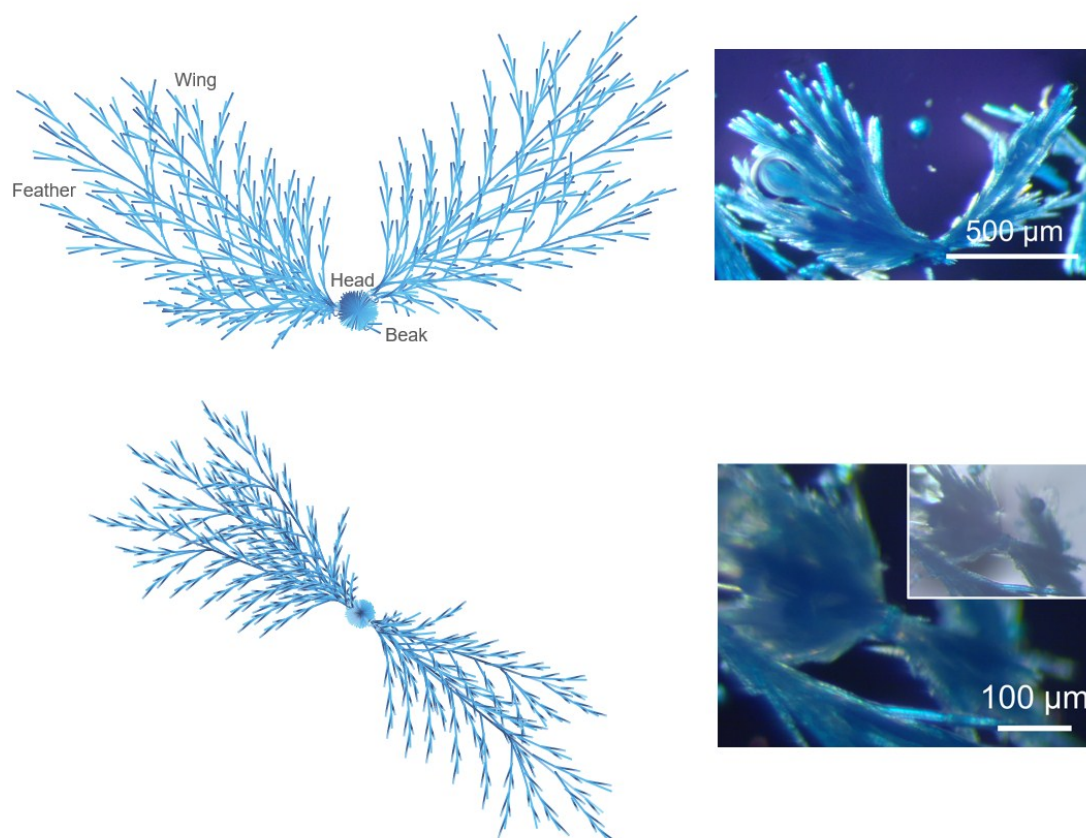

**Figure S8.** Scheme illustration of the formation of spherical MOF-74-III/plumose MOF-74-II quaternary superstructures, the corresponding optical images and polarized optical images of MOF-74-III/plumose MOF-74-II superstructures. The blue color of the crystals is visualized by the doped dye, metal phthalocyanine ligand.

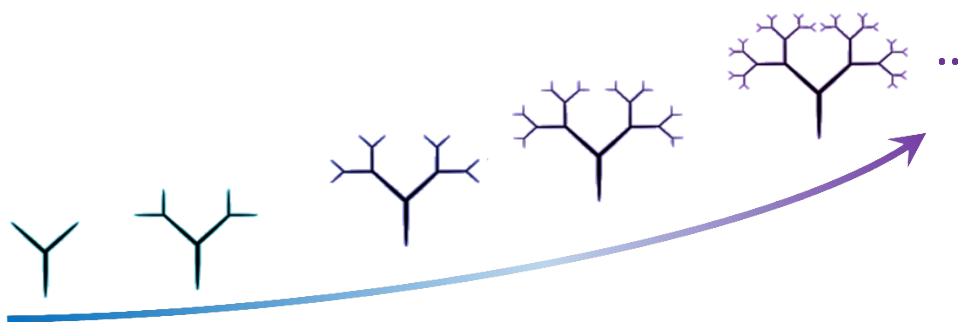

**Figure S9.** The phenomenon of fractal structures observed both in nature and in this work (plumose MOF-74-II).

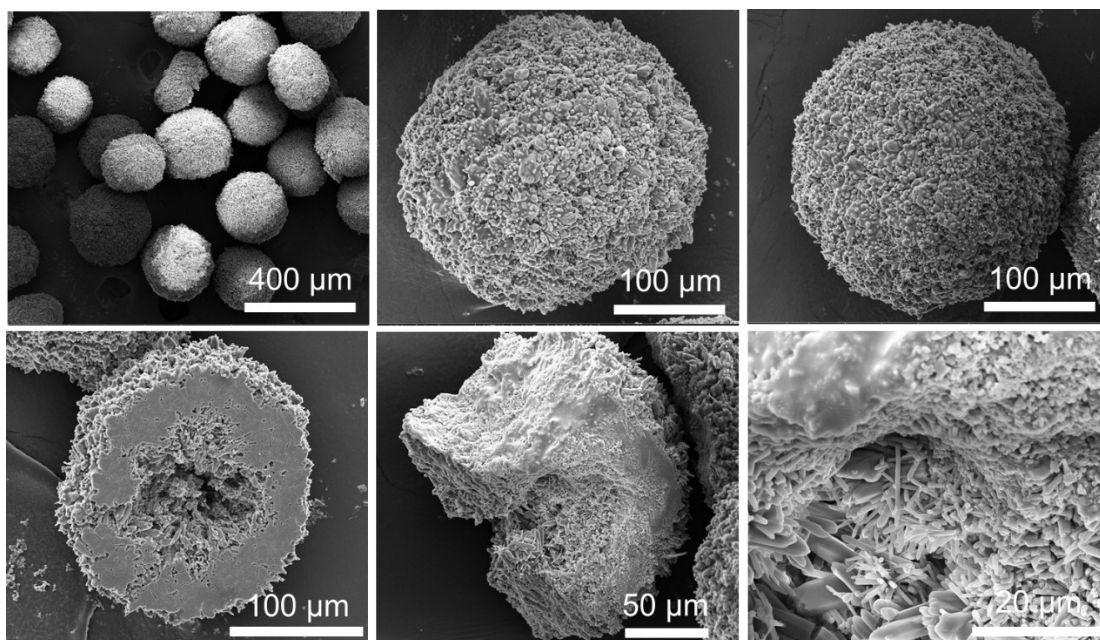

**Figure S10.** SEM images of hollow sphere aggregates assembled by MOF-74-I needle crystallites.

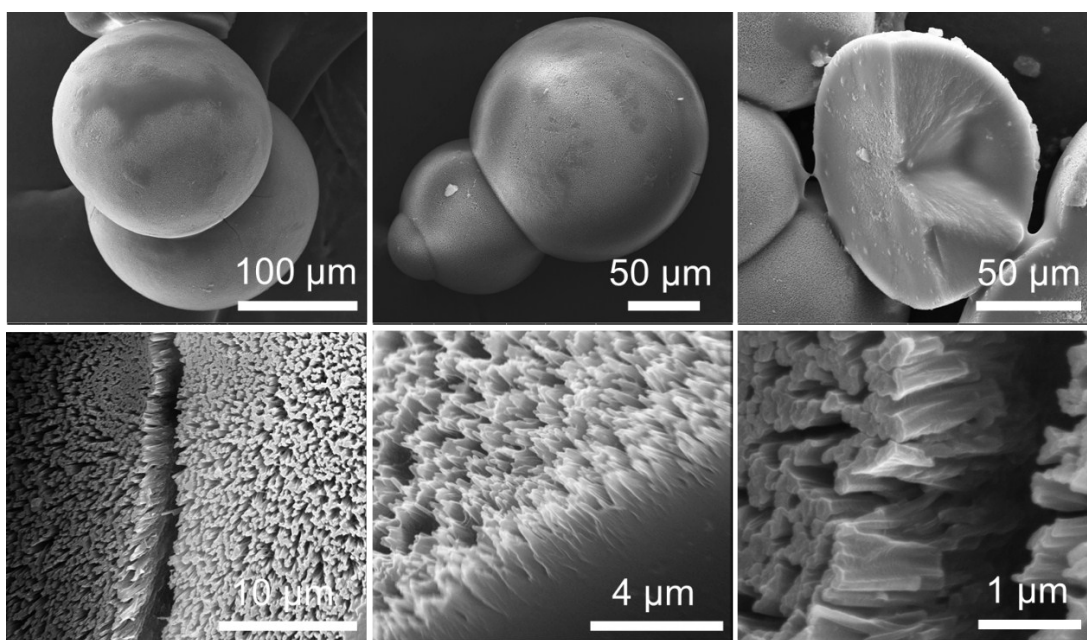

**Figure S11.** SEM images of MOF-74-III@MOF-74-III spherulites after secondary growth.

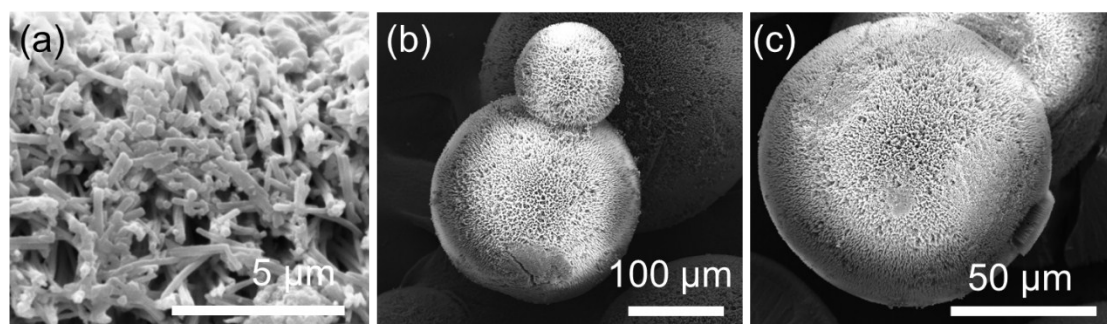

**Figure S12.** SEM images of pure (a) MOF-74-I needles, (b) MOF-74-II spherulites and (c) MOF-74-III spherulites.



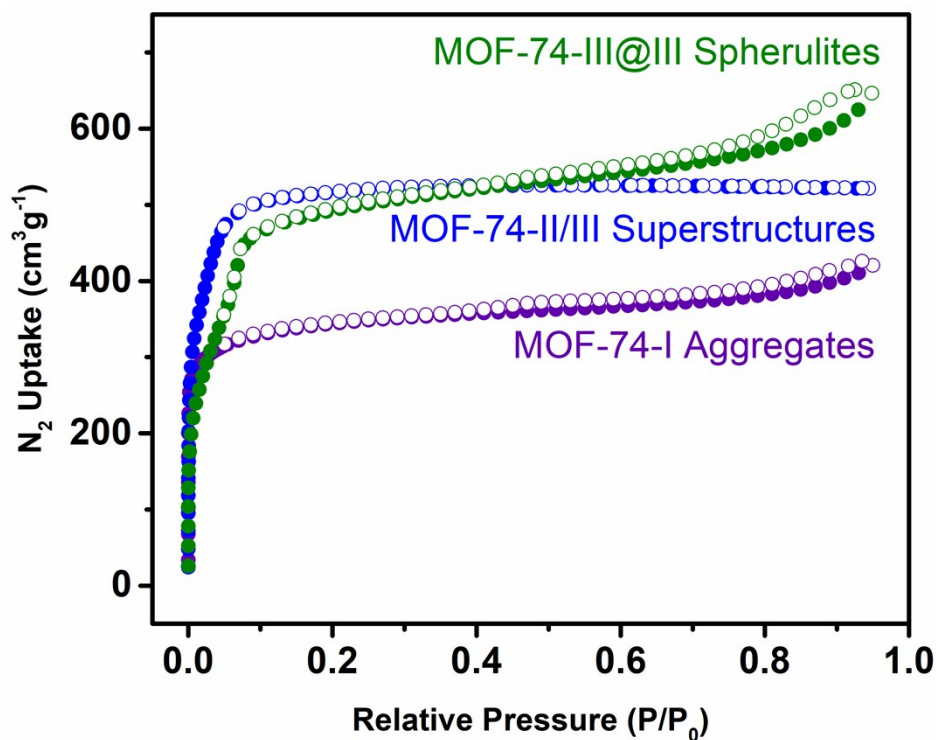

**Figure S13.** N<sub>2</sub> adsorption isotherms of MOF-74-III@III spherulites, spherical MOF-74-III/plumose MOF-74-II superstructures and MOF-74-I hollow aggregates at 77 K.

## References

1. Bai, M.; Song, R.; Zhang, Y.; Han, S.; Song, X.; Meng, F., Trimellitic anhydride- and pyromellitic dianhydride-originated tetrakis/octakis(octyloxycarbonyl)phthalocyaninato metal complexes. *Inorg. Chem. Comm.* **2013**, *28*, 99-103.
2. Peng, S.; Bie, B. L.; Sun, Y. Z. S.; Liu, M.; Cong, H. J.; Zhou, W. T.; Xia, Y. C.; Tang, H.; Deng, H. X.; Zhou, X., Metal-organic frameworks for precise inclusion of single-stranded DNA and transfection in immune cells. *Nat. Commun.* **2018**, *9*, 1293.
